# Supplementary material for: Effects of Data Quality and Quantity on Deep Learning for Protein-Ligand Binding Affinity Prediction
Source: Preprints.org preprint supplement (doi:10.20944/preprints202201.0365.v1), 2022-01-25
Supplement: Supplementary file 1 [file SI_IJMS_24Jan2022_Fan.pdf › SI_IJMS_24Jan2022_Fan.pdf]

## Supplementary Materials

# How Data Quality and Quantity Affect a Deep Learning Model for Protein-Ligand Binding Affinity Prediction

Frankie J Fan<sup>1</sup> and Yun Shi<sup>2,\*</sup>

<sup>1</sup>School of Health, Medical and Applied Sciences, Central Queensland University, Bundaberg, Queensland 4670, Australia; [f.fan@cqu.edu.au](mailto:f.fan@cqu.edu.au) and [hustakin@gmail.com](mailto:hustakin@gmail.com)

<sup>2</sup>Institute for Glycomics, Griffith University, Southport, Queensland 4222, Australia; [y.shi@griffith.edu.au](mailto:y.shi@griffith.edu.au)

\*Correspondence: [y.shi@griffith.edu.au](mailto:y.shi@griffith.edu.au)

Supplementary List

Included in a separate file

Supplementary Tables

Page 2 - 5

**Table S1.** Description of all datasets used in this study.

| <b>Dataset<sup>1</sup></b>    | <b>Size</b>   | <b>Description</b>                                                                                                                                    |
|-------------------------------|---------------|-------------------------------------------------------------------------------------------------------------------------------------------------------|
| KDKI set                      | 365,021       | Data curated from BindingDB                                                                                                                           |
| External test set             | 45,021        | Random division of the KDKI set                                                                                                                       |
| Baseline set                  | 320,000       |                                                                                                                                                       |
| pK + [-1,1]                   | 320,000       | Adding a random value between -1 and 1 to each pK                                                                                                     |
| pK + [-2,2]                   | 320,000       | Adding a random value between -2 and 2 to each pK                                                                                                     |
| pK + [-3,3]                   | 320,000       | Adding a random value between -3 and 3 to each pK                                                                                                     |
| pK +1/-1                      | 320,000       | Adding a random value of either 1 or -1 to each pK                                                                                                    |
| pK +2/-2                      | 320,000       | Adding a random value of either 2 or -2 to each pK                                                                                                    |
| pK +3/-3                      | 320,000       | Adding a random value of either 3 or -3 to each pK                                                                                                    |
| 160k set                      | 160,000       | Randomly selected from the Baseline set                                                                                                               |
| 80k set                       | 80,000        |                                                                                                                                                       |
| 40k set                       | 40,000        |                                                                                                                                                       |
| 20k set                       | 20,000        |                                                                                                                                                       |
| 10k set                       | 10,000        |                                                                                                                                                       |
| 5k set                        | 5,000         |                                                                                                                                                       |
| 2.5k set                      | 2,500         |                                                                                                                                                       |
| 1.25k set                     | 1,250         |                                                                                                                                                       |
| Ligand seen, protein seen     | 28,860~29,189 | Subsets of the external test set based on the presence/absence (seen/unseen) of ligand/protein in the Baseline set, varying in size among triplicates |
| Ligand unseen, protein seen   | 15,759~16,059 |                                                                                                                                                       |
| Ligand seen, protein unseen   | 46~77         |                                                                                                                                                       |
| Ligand unseen, protein unseen | 27~33         |                                                                                                                                                       |

<sup>1</sup> Except the KDKI set, all datasets were generated in triplicates.

**Table S2.** Performance comparison of models trained on datasets with different degrees of errors and tested on individual internal test sets.

| <b>Dataset</b> | <b>RMSE<sup>1</sup></b> | <b>MSE<sup>1</sup></b> | <b>PCC<sup>1</sup></b> | <b>Concordance<sup>1</sup></b> |
|----------------|-------------------------|------------------------|------------------------|--------------------------------|
| Baseline set   | 0.870 (0.002)           | 0.757 (0.004)          | 0.803 (0.001)          | 0.802 (0.001)                  |
| pK + [-1,1]    | 1.092 (0.003)           | 1.192 (0.007)          | 0.720 (0.002)          | 0.757 (0.001)                  |
| pK + [-2,2]    | 1.539 (0.008)           | 2.368 (0.024)          | 0.565 (0.006)          | 0.687 (0.002)                  |
| pK + [-3,3]    | 2.046 (0.005)           | 4.185 (0.019)          | 0.434 (0.003)          | 0.638 (0.001)                  |
| pK +1/-1       | 1.411 (0.001)           | 1.990 (0.002)          | 0.607 (0.002)          | 0.704 (0.001)                  |
| pK +2/-2       | 2.288 (0.006)           | 5.235 (0.026)          | 0.386 (0.006)          | 0.624 (0.002)                  |
| pK +3/-3       | 3.214 (0.003)           | 10.332 (0.17)          | 0.266 (0.005)          | 0.602 (0.002)                  |

<sup>1</sup> Reported values are mean (standard deviation) of triplicate runs.

**Table S3.** Performance comparison of models trained on data subsets of different sizes and tested on the external test set.

| <b>Dataset</b> | <b>RMSE<sup>1</sup></b> | <b>MSE<sup>1</sup></b> | <b>PCC<sup>1</sup></b> | <b>Concordance<sup>1</sup></b> |
|----------------|-------------------------|------------------------|------------------------|--------------------------------|
| Baseline set   | 0.868 (0.008)           | 0.753 (0.014)          | 0.804 (0.004)          | 0.802 (0.002)                  |
| 160k set       | 0.968 (0.008)           | 0.937 (0.015)          | 0.751 (0.006)          | 0.775 (0.003)                  |
| 80k set        | 1.081 (0.009)           | 1.169 (0.020)          | 0.687 (0.003)          | 0.743 (0.002)                  |
| 40k set        | 1.164 (0.011)           | 1.356 (0.026)          | 0.607 (0.007)          | 0.703 (0.004)                  |
| 20k set        | 1.203 (0.017)           | 1.448 (0.026)          | 0.575 (0.004)          | 0.690 (0.003)                  |
| 10k set        | 1.249 (0.002)           | 1.561 (0.041)          | 0.525 (0.007)          | 0.670 (0.003)                  |
| 5k set         | 1.295 (0.035)           | 1.678 (0.005)          | 0.474 (0.012)          | 0.651 (0.005)                  |
| 2.5k set       | 1.352 (0.018)           | 1.829 (0.096)          | 0.412 (0.026)          | 0.629 (0.009)                  |
| 1.25k set      | 1.426 (0.046)           | 2.034 (0.050)          | 0.305 (0.035)          | 0.591 (0.015)                  |

<sup>1</sup> Reported values are mean (standard deviation) of triplicate runs.

**Table S4.** Performance comparison of models trained on data subsets of different sizes and tested on individual internal test sets.

| <b>Dataset</b> | <b>RMSE<sup>1</sup></b> | <b>MSE<sup>1</sup></b> | <b>PCC<sup>1</sup></b> | <b>Concordance<sup>1</sup></b> |
|----------------|-------------------------|------------------------|------------------------|--------------------------------|
| Baseline set   | 0.870 (0.002)           | 0.757 (0.004)          | 0.803 (0.001)          | 0.802 (0.001)                  |
| 160k set       | 0.969 (0.002)           | 0.939 (0.005)          | 0.751 (0.002)          | 0.774 (0.001)                  |
| 80k set        | 1.083 (0.006)           | 1.173 (0.014)          | 0.688 (0.005)          | 0.742 (0.002)                  |
| 40k set        | 1.173 (0.010)           | 1.376 (0.024)          | 0.597 (0.003)          | 0.698 (0.001)                  |
| 20k set        | 1.197 (0.017)           | 1.433 (0.040)          | 0.577 (0.004)          | 0.690 (0.002)                  |
| 10k set        | 1.263 (0.033)           | 1.595 (0.082)          | 0.528 (0.021)          | 0.671 (0.009)                  |
| 5k set         | 1.259 (0.006)           | 1.584 (0.014)          | 0.461 (0.022)          | 0.645 (0.002)                  |
| 2.5k set       | 1.304 (0.048)           | 1.701 (0.123)          | 0.449 (0.023)          | 0.643 (0.020)                  |
| 1.25k set      | 1.407 (0.079)           | 1.984 (0.219)          | 0.296 (0.060)          | 0.593 (0.054)                  |

<sup>1</sup> Reported values are mean (standard deviation) of triplicate runs.
